## 1 **Species substitution in the meat value chain by high-resolution melt analysis of mitochondrial** 2 **PCR products**

3  
4 Jane K. Njaramba<sup>1,2</sup>, Lillian Wambua<sup>3\*</sup>, Titus Mukiyama<sup>2</sup>, Nelson Onzere Amugune<sup>2</sup>, Jandouwe  
5 Villinger<sup>1</sup>

- 6 1. International Centre of Insect Physiology and Ecology (*icipe*), P.O. Box 30772 - 00100,  
7 Nairobi, Kenya
- 8 2. University of Nairobi, School of Biological Sciences, P.O. Box 30197–00100, Nairobi, Kenya
- 9 3. International Livestock Research Institute, Animal and Human Health division, P.O Box 30709  
10 – 00100 Nairobi, Kenya

11 \*Corresponding author address: [wambua.lillian@gmail.com](mailto:wambua.lillian@gmail.com)

### 13 **Abstract**

14 Food fraud in several value chains including meat, fish, and vegetables has gained global interest in  
15 recent years. In the meat value chain, substitution of high commercial-value meats with similar cheaper  
16 or undesirable species is a common form of food fraud that raises ethical, religious, and dietary  
17 concerns. The presence of undeclared species could also pose public health risks caused by allergic  
18 reactions and the transmission of food-borne or zoonotic pathogens. Measures to monitor meat  
19 substitution are being put in place in many developed countries. However, information about similar  
20 efforts in sub-Saharan Africa is sparse. In this study, we used PCR coupled with high-resolution  
21 melting (PCR-HRM) analysis targeting the three mitochondrial genes, cytochrome oxidase 1 (*COI*),  
22 cytochrome b (*cyt b*), and *16S rRNA*, to detect species substitution in meat sold to consumers in  
23 Nairobi, Kenya's capital city. Out of 107 meat samples from seven common livestock animals (cattle,  
24 goat, sheep, pig, chicken, rabbit, and camel), 11 (10.3%) had been substituted. Of 61 samples sold as  
25 beef, two were goat and one was camel. Of 30 samples sold as goat meat, four were mutton (sheep) and  
26 three were beef. One of nine samples purchased as pork was beef. Our results indicate that PCR-HRM  
27 analysis is a cost and time effective technique that can be employed to detect species substitution. The  
28 combined use of the three markers produced PCR-HRM profiles that successfully allowed the

29 distinction of species. We demonstrate its utility not only in analysis of raw meat samples, but also of  
30 cooked, dried, and rotten samples, meat mixtures, and with the use of different DNA extraction  
31 protocols. We propose that this approach has broad applications in authentication of meat products and  
32 protection of consumers from food fraud in the meat industry in low- and middle-income countries  
33 such as Kenya, as well as in the developed world.

34 **Key words:** food fraud, species substitution, meat value chain, PCR-HRM, high resolution melt  
35 analysis, 16S rRNA, cytochrome c oxidase subunit 1, cytochrome b

## 36 1. Introduction

37 Food fraud, the intentional act of adulterating food products, often for dishonest economic gain is an  
38 emerging concern in global trade as a crime against consumer rights, and due to the inherent risks  
39 posed to public health. Food fraud is largely perpetrated by counterfeit descriptions of products with  
40 respect to their weights, details of origin, types of processing, and constituents (ingredients) (Spink &  
41 Moyer, 2011). Food fraud has been reported in most value chains, including spices (Silvis et al., 2017),  
42 milk (Handford et al., 2016), edible oils (Yadav, 2018), cereals (Nasreen & Ahmed, 2014), vegetables  
43 (Panghal et al., 2018; Woolfe & Primrose, 2004), and meat (Chuah et al., 2016; Ren et al., 2017),  
44 whereby fraudulent substitution of ingredients or adulteration of products with similar but cheaper  
45 options has been highlighted as major malpractice.

46 In the meat industry, the major fraudulent practice entails substitution of meats of high commercial  
47 value with those from cheaper or undesirable species (Chuah et al., 2016; Farag et al., 2015). Major  
48 global incidences of species substitution have been reported, such as the horsemeat scandal in the UK  
49 and Ireland where beef was substituted with horse meat (Di Pinto et al., 2015) and in China, where  
50 mutton was substituted with murine meat (Fang & Zhang, 2016). In Kenya, substitution of beef and  
51 chevron with bushmeat (Kimwele et al., 2012; Ouso et al., 2020) in addition to reports of species-  
52 substitution (Kenya Markets Trust, 2019) necessitates further study of efficient methods of detecting

53 this malpractice in meat value chains. Species substitution in meat products inhibits fair trade (Ballin et  
54 al., 2009) and raises ethical and religious concerns where species substitutes sold are considered  
55 offensive (Al-Kahtani et al., 2017; Chuah et al., 2016). Undeclared meat species are also a health  
56 liability to those with allergies (Di Pinto et al., 2015) and are associated with public health safety risks  
57 such as those posed by foodborne or zoonotic diseases. Substituting species utilized are frequently  
58 acquired from unconventional sources, such a wildlife (bushmeat), and could have been subjected to  
59 unhygienic handling and may not have undergone quality checks like meat inspection (Alarcon et al.,  
60 2017a).

61 Detection of adulteration in the meat value chain relies on analytical techniques such as  
62 chromatography, mass spectrophotometry, imaging, and serology to identify particular contaminants,  
63 proteins, metabolites, and validate authenticity (Abbas et al., 2018; Cawthorn et al., 2013; Farag et al.,  
64 2015). However, for analysis of species substitution, DNA-based techniques have been increasingly  
65 adopted due to the inherent limitations in specificity and sensitivity associated with the aforementioned  
66 techniques (Abbas et al., 2018), leading to the recognition of “Food Forensics” as a tool to investigate  
67 food fraud (Woolfe & Primrose, 2004). The use of DNA to identify species on the basis of universal  
68 barcoding markers has been reliably tested (Farag et al., 2015; Ouso et al., 2020). These methods have  
69 evolved from the more conventional PCR-based techniques (Farag et al., 2015; Sakaridis et al., 2013)  
70 to more novel techniques including PCR coupled with high-resolution melting (HRM) analysis. PCR-  
71 HRM allows for discrimination of DNA variants by detection of nucleotide sequence differences such  
72 as single nucleotide polymorphisms (SNPs) and insertions and deletions (indels) based on their melting  
73 profiles, hence enabling genotyping of species (Reed et al., 2007). PCR-HRM analysis has also been  
74 used to identify vertebrate species in insect blood-meals (Omondi et al., 2015), bushmeat (Ouso et al.,  
75 2020), and adulteration of buffalo meat (Sakaridis et al., 2013). Nevertheless, the accuracy of results  
76 for DNA-based analyses depends fundamentally on obtaining quality DNA to identify the species

77 origins of frozen, cooked, processed, rotting, or mixed meat products (Cawthorn et al., 2013; Farag et  
78 al., 2015; Sakaridis et al., 2013).

79 Studies have demonstrated the potential application of DNA sequencing to identify adulteration in meat  
80 products based on *COI* and *cyt b* genes (Kimwele et al., 2012; Song'oro et al., 2012; Mbugua et al.,  
81 2014; Bourguiba-Hachemi & Fathallah, 2016). While useful, the need for elaborate and relatively  
82 expensive post-PCR procedures, such as DNA sequencing, severely limits their usefulness in routine  
83 monitoring of meat fraud in Kenya and other low-resource settings. Additionally, the effect of different  
84 physicochemical states of meat on PCR efficiency remains understudied. Therefore, we studied the  
85 utility of PCR-HRM analysis targeting *COI*, *cyt b*, and *16S rRNA* genes to investigate species  
86 substitution in Nairobi, Kenya. We also aimed to test the effect of various meat matrices (e.g. fresh,  
87 dried, cooked, or rotten meat), different DNA extraction protocols, and mixed-meat samples on species  
88 identification by PCR-HRM analysis.

## 89 **2. Materials and Methods**

### 90 **2.1 Meat samples**

91 We purchased 107 meat samples in November 2018 from randomly selected stalls in Nairobi's major  
92 meat wholesale market (Burma market), and butcheries in the surrounding estates of Eastleigh,  
93 Kariokor, Kaloleni, Mukuru Village, Mathare, Jerusalem, Jericho, Ngara, and Makongeni  
94 (Supplementary Figure 1). Meat samples of species commonly bought by households were purchased,  
95 including 61 cattle, 30 goat, three camel, nine pig, and four chicken samples. Each 250-g sample was  
96 packed separately and transported in cooler boxes with ice packs to the lab. Sub-samples (1 g) were  
97 carefully excised from the internal portion of each sample to obtain two replicates. Sterile blades and  
98 fresh gloves were used for each sample on a sterile surface. The replicates were then stored in 2-ml  
99 cryovials at -80°C pending DNA extraction. Twenty-four reference meat samples of known vertebrates  
100 archived from a previous study (Ouso et al., 2020) were used as positive controls (Supplementary

101 Table 1). Genomic DNA was DNA extracted from the sub-samples using the ISOLATE II Genomic  
102 DNA Extraction Kit (Bioline, UK) following the manufacturer's instructions.

### 103 **2.2 Identification of vertebrate sources of meat by PCR-HRM**

104 To identify the vertebrate species, DNA extracts from the test samples and positive controls (reference  
105 samples) were then analyzed by PCR-HRM of vertebrate mitochondrial *cyt b*, *COI*, and *16S rDNA* as  
106 previously described (Ogola et al., 2017; Omondi et al., 2015; Ouso et al., 2020). Briefly, 10- $\mu$ l PCR  
107 reactions were set up, each comprised of 1X HOT FIREPol® EvaGreen® HRM Mix no ROX (Solis  
108 BioDyne, Tartu, Estonia), 0.5  $\mu$ M of both forward and reverse primers, 20 ng DNA template and  
109 nuclease free water. Each run included a negative control where ddH<sub>2</sub>O was added in place of DNA  
110 template. The PCR-HRM analyses were carried out in a RotorGene Q thermocycler (Qiagen, Germany)  
111 as described by Ouso *et al.* (2020). Briefly, the cycling conditions involved an initial hold at 95°C for  
112 15 minutes, followed by 40-45 cycles of denaturation at 95°C for 20 seconds, annealing for 20 seconds  
113 at 56°C, and an extension step at 72°C for 30 seconds. This was followed by the final extension step,  
114 an additional 5 minutes at 72°C. The amplicons were then gradually melted from 75°C to 95°C while  
115 recording fluorescence at after two seconds at 0.1°C increments. Melt rate and normalized HRM  
116 graphs were generated from the fluorescence data, using the Rotor-Gene Q Series Software (2.3.1 build  
117 49). Meat-source species were distinguished by analyzing the melt rate (melting temperature (T<sub>m</sub>)  
118 peaks) and normalized profiles of the test samples against those of the reference species. For species  
119 with single T<sub>m</sub>-peaks, we also examined the T<sub>m</sub>-deviation from the control, with similar species  
120 expected to have T<sub>m</sub> shifts of < 1°C.

### 121 **2.3 Analysis of various physicochemical treatments of meat on PCR-HRM**

122 To study the effect of various physicochemical conditions of meat samples on species identification by  
123 PCR-HRM analysis, we utilized sub-samples from our collection of positive controls (see  
124 Supplementary Table 1). Sub-samples from each of goat (*Capra hircus*), sheep (*Ovis aries*), pig (*Sus*

125 *scrofa domesticus*), and chicken (*Gallus gallus domesticus*), cattle (*Bos taurus*) and camel (*Camelus*  
126 *dromedarius*) were exposed to different treatments to simulate fresh, dried, cooked (microwaved), and  
127 rotting/decomposed meat. This was achieved by obtaining four replicates weighing 60 mg from each  
128 sub-sample and treating them as follows: the first replicate was used as the fresh meat with no  
129 treatment was applied, the second replicate was dried in an oven at 65°C for 2 hours, the third replicate  
130 was heated in a microwave oven for 12 minutes to simulate cooking, and the fourth replicate was left  
131 on the lab bench for 72 hours to decompose. Genomic DNA was extracted from the replicates of all  
132 samples as described above in section 2.1, followed by PCR-HRM of the *COI* gene, *cyt b*, and *16S*  
133 *rRNA* genes as described in section 2.2.

#### 134 **2.4 Analysis of effect of different extraction protocols**

135 To study the impact of different DNA extraction protocols on species identification by PCR-HRM,  
136 sub-samples were obtained from two cattle, four goats, one sheep and two camels as described in  
137 section 2.3 above and subjected to four extraction protocols. Each sub-sample was divided into four 50-  
138 mg replicates and DNA was extracted as follows: The first replicate was extracted using the ISOLATE  
139 II Genomic DNA Kit as described in 2.1 and the second using the DNeasy Blood and Tissue Kit  
140 protocol (Qiagen, Valencia, CA) according to the manufacturer's guidelines. The third replicate was  
141 extracted using a lab-optimized protocol described by Kipanga and co-workers (Kipanga et al., 2014).  
142 The fourth replicate was extracted using a modified version of the aforementioned protocol, where  
143 proteinase K was omitted during the cell-lysis step. The extracted DNA was then standardized to 10  
144 ng/ $\mu$ l and analyzed using PCR-HRM of *COI*, *cyt b*, and *16S rRNA* as described in section 2.2. The melt  
145 profiles were then compared to check for any differences in melt temperature or profile due to  
146 extraction protocol differences.

#### 147 **2.5 Analysis of species admixtures in meat by PCR-HRM**

148 We investigated whether PCR-HRM could be successfully used to identify mixed species in meat,  
149 which is a common adulteration in processed meat. The following mixtures were prepared from the  
150 reference samples: cattle + sheep; sheep + goat; cattle + goat; cattle + camel; chicken + pork; and  
151 chicken + Nile perch. In each case, triplicates containing 50 mg of each of the two species in the  
152 combinations above were placed into separate tubes. Genomic DNA was then extracted from the  
153 individual triplicates using the ISOLATE II Genomic DNA Kit as described in section 2.1. This was  
154 followed by PCR-HRM analysis of the three mitochondrial markers (*COI*, *cyt b*, and *16S rRNA*) as  
155 previously described. DNA extracts from individual reference samples, i.e. individual positive controls  
156 of cattle, sheep, goat, chicken, pork, camel, and Nile perch, were also analyzed alongside the mixed  
157 samples.

## 158 **2.6 Vertebrate species confirmation and statistical analysis**

159 To confirm the vertebrate species in the meat samples, the DNA was amplified using primers that  
160 target a longer segment (750 bp), the barcoding region of the *COI* gene, as described previously  
161 (Ivanova et al., 2012; Ouso et al., 2020). This involved amplification using conventional PCR using 15-  
162 µl reaction volumes which included 1X HOT FIREPol® Blend Master Mix (Solis BioDyne, Tartu,  
163 Estonia), 0.5 µM concentrations of both forward (5'-TCT CAA CCA ACC ACA ARG AYA TYG G-  
164 3') and reverse (5'-TAG ACT TCT GGG TGG CCR AAR AAY CA-3') primers and 2 µl of DNA  
165 template. The cycling conditions were those described by Ouso *et al.* (Ouso et al., 2020). The resulting  
166 amplicons were cleaned using the ExoSAP-IT protocol (USB Corporation, Cleveland, OH) and  
167 sequenced at Macrogen Inc. (Netherlands). Sequences were analyzed using Geneious version 11.1.5  
168 (Kearse et al., 2012; Lee et al., 2012) and queried against the GenBank nr database (<http://www.ncbi.nlm.nih.gov/>) using the Basic Local Alignment Search Tool (BLAST; Altschul et al., 1990) and the  
169 Barcode of Life Database (BOLD; <http://www.boldsystems.org>; Ratnasingham & Hebert, 2007). The  
170 statistical software NCSS 2020 (NCSS, Kaysville, Utah, USA; <https://www.ncss.com/>) was used to  
171

172 create box plots of the variance in melting temperatures observed using different extraction conditions  
173 or physicochemical treatments.

### 174 3. Results

#### 175 3.1 Vertebrate sources of meat sold in butcheries in Nairobi

176 PCR-HRM analysis of the *cyt b*, *COI*, and *16S rRNA* genes (Supplementary Figure 2) of 107 meat  
177 samples revealed the vertebrate sources as 62 cattle (57.94 %), 25 goats (23.36%), eight pigs (7.47%),  
178 four camels (3.74%), four chicken (3.74%), and four sheep (3.74%). Identifications were confirmed by  
179 sequencing of the long *COI* barcode amplicons. Eleven (10.3%) meat samples were misidentified by  
180 sellers. Of 61 samples sold as beef, two were substituted with goat meat and one with camel meat. Of  
181 30 samples sold as goat meat, four were mutton (sheep meat) and three were beef. One of the nine  
182 samples purchased as pork was beef (Figure 1). Pair-wise comparison of the amplicons allowed for the  
183 distinction of different species using the three primers (Figure 2).

184 **Figure 1: Species substitution of meat sampled in Nairobi.** Stacked bar graph showing vertebrate  
185 species of meat identified by PCR-HRM against the identity of the species purchased in the meat  
186 market. Numbers against each species refers to *n*, the number of species identified using PCR-HRM.  
187 Species substitution was identified in cattle, goat and pig samples.

188 **Figure 2: Pairwise discrimination of vertebrate sources of meat by PCR-HRM analysis:** Three  
189 mitochondrial markers *COI*, *cyt b* and *16S rRNA* were compared. The ability of these markers to  
190 distinguish eight different vertebrate species commonly consumed in Kenyan households was  
191 compared and the summary matrix was generated.

#### 192 193 3.2 Effect of physicochemical condition of meat samples on vertebrate species identification by

##### 194 PCR-HRM

195 We found that the application of various treatments had minimal effect on the HRM melt profiles of the  
196 respective PCR amplicons. All samples irrespective of the physicochemical condition, were amplified  
197 by at least one of the markers and the vertebrate species could be reliably identified despite slight shifts  
198 in the melting temperature ( $T_m$ ) of the resulting amplicons. Amplification was highest in raw samples,  
199 with all of them being successfully detected using all three markers. However, we observed relative



200 reduction in the amplification of the markers different treatments. In the *COI* gene, 8/16 of the  
201 microwaved, 2/16 of the rotten, and 4/16 of the oven-dried samples did not amplify, while in the assay  
202 targeting the *cyt b* marker, 10/16 of the microwaved samples, 2/16 of the oven-dried samples, and 1/16  
203 rotten samples did not amplify. The *16S rRNA* did not amplify for 6/16 of the microwaved and 1/16 of  
204 the oven-dried samples.

205 Comparing the melting temperature  $T_m$  of PCR amplicons obtained from oven-dried, cooked, and  
206 rotten meat with the raw samples indicated slight shifts in the  $T_m$ . The *cyt b* marker had the highest  
207 impact on the  $T_m$  as observed by the range in  $T_m$  shift, when samples exposed to the different  
208 conditions, whereas the  $T_m$  of the *COI* marker was least affected by meat treatment. The shift in  $T_m$   
209 from the raw-meat controls was  $< 1^\circ\text{C}$  in all markers for all samples except one microwaved cattle  
210 sample, which had a *16S rRNA*  $T_m$  shift of  $+1.63^\circ\text{C}$ . Consequently, the widest range in primary-peak  
211  $T_m$  was seen in microwaved samples, followed by those degraded, and oven-dried showing the least  
212 variation from the  $T_m$  observed in the control (raw) meat samples (Figures 3 and 4). We noted that the  
213 amplification of the *16S rRNA* marker resulted in single peaks in all the species tested, whereas the *cyt*  
214 *b* and *COI* markers resulted in prominent secondary peaks that help to distinguish cattle, sheep, and  
215 chicken (Supplementary Figure 3). Camel samples had double peaks only in the *cyt b* region, whereas  
216 pig only had multiple peaks in the *COI* region.

217 **Figure 3: PCR-HRM profiles of representative reference samples exposed to different**  
218 **physicochemical conditions.** Goat, sheep and chicken meat samples were exposed in replicate to  
219 different conditions; raw, rotten, oven-dried and microwaved. Their PCR-HRM profiles were then  
220 assessed using *COI*, *cyt b* and *16S rRNA*. For each marker, the HRM profiles are represented as melt  
221 rates and normalized HRM profiles. Melt rates are represented as change in fluorescence units with  
222 increasing temperatures ( $dF/dT$ ) and HRM profiles are represented as percent fluorescence with  
223 increase in temperature for a) *COI*, b) *cyt b*, and c) *16S rRNA* markers.

224  
225 **Figure 4: Box plots of peak melting temperatures ( $^\circ\text{C}$ ) of meat samples exposed to different**  
226 **physicochemical conditions.** Replicate meat samples from goat, sheep, pig, cattle, camel, and chicken  
227 were exposed to different conditions; raw, rotten, oven-dried, and microwaved. The peak PCR-HRM  
228 melt rate temperatures were plotted for a) *COI*, b) *cyt b*, and c) *16S rRNA* markers.

229

### 230 **3.3 Effect of different DNA extraction protocols on PCR-HRM**

231 Using the different DNA extraction protocols, we observed similar melt profiles with minimal T<sub>m</sub>  
232 shifts (< 1°C). The *COI* marker had the widest range in T<sub>m</sub>, followed by *cyt b* (Figure 5; Figure 6).  
233 The use of different extraction protocols did not result in overlapping of profiles of any of the species  
234 analyzed. All markers could be used to distinguish the species of the samples, regardless of extraction  
235 protocol used, with the exception of cattle and sheep which yielded similar HRM melt profiles with  
236 *16S rRNA* marker (Supplementary Figure 4).

237 **Figure 5: Effect of different DNA extraction protocols on PCR-HRM profiles of selected**  
238 **reference vertebrate species.** DNA were extracted from goat, camel and cattle meat samples using  
239 four different extraction protocols in replicates. These protocols included two kits: DNeasy Blood and  
240 Tissue Kit protocol, the ISOLATE II Genomic DNA Extraction Kit and two manual extraction  
241 protocols. Their PCR-HRM profiles were then assessed using *COI*, *cyt b* and *16S rRNA*. For each  
242 marker, the HRM profiles are represented as melt rates and normalized HRM profiles. Melt rates are  
243 represented as change in fluorescence units with increasing temperatures (dF/dT) and HRM profiles are  
244 represented as percent fluorescence with increase in temperature for a) *COI*, b) *cyt b*, and c) *16S rRNA*  
245 markers.

246  
247 **Figure 6: Box plots of peak melting temperature (°C) seen in meat samples extracted using**  
248 **different extraction protocols.** DNA from four vertebrate species (two cattle, four goats, one sheep  
249 and two camels) were extracted in replicate using two commercial kits; DNeasy Blood and Tissue Kit  
250 protocol, the ISOLATE II Genomic DNA Extraction Kit, and two manual extraction protocols. The  
251 peak PCR-HRM melt rate temperatures were plotted for a) *COI*, b) *cyt b*, and c) *16S rRNA* markers.  
252

### 253 **3.4 Distinction of species in mixed meat samples using PCR-HRM**

254 Amplification targeting the marker *16S rRNA* gave the best resolution in distinguishing the individual  
255 vertebrate species in mixed meat samples (meat samples with 2 or more vertebrate species). The only  
256 mixed samples that could not be determined using the *16S rRNA* marker were mixtures of cattle and  
257 sheep meat, which could however be distinguished by the *cyt b* marker (Figures 2 and 7). The *cyt b*  
258 marker, clearly resolved white meat mixtures including chicken and pork and Nile perch and pork, with  
259 individual HRM curves corresponding with the composite vertebrate species. However, differentiating  
260 sources of red meat using the *cyt b* marker was limited. For instance, all mixtures that contained goat  
261 meat only showed the melt profile of goat *cyt b* profile. The melting profiles obtained from the *COI*

262 marker showed slight variations between pure samples (meat samples with one vertebrate species) and  
263 the mixed meat samples.

264 **Figure 7: PCR-HRM melt rate profiles of pure (single species) and mixed meat samples assessed**  
265 **using three mitochondrial markers *COI*, *cyt b* and *16S rRNA*.** The left column represents red meat  
266 sources (sheep, goat, cattle, and camel) and their corresponding mixtures, whereas the right column  
267 represents DNA from white meat sources (Nile perch, chicken, and pig) and their mixtures. Distinct  
268 melt rates are represented as change in fluorescence units with increasing temperatures (dF/dT) for a)  
269 *COI*, b) *cyt b*, and c) *16S rRNA* markers.

270

#### 271 4. Discussion

272 This study revealed significant levels of species substitution in products retailed in Nairobi's major  
273 meat market. Goat meat had the highest levels of substitution, with mutton and beef being used as  
274 alternatives. Our results compare with those of Cawthorn and co-workers (2013), who reported  
275 detection of mutton and beef as common substitutes in the meat value chain in South Africa. In Kenya,  
276 this substitution is likely to be driven by the relatively higher price of goat meat (USD 5.5 – 6.0 per kg)  
277 relative to mutton and beef (USD 3 – 4.5 per kg) (Alarcon et al., 2017b). Goat meat is preferred for  
278 preparing “*Nyama Choma*”, a roasted meat delicacy in eastern Africa that is increasingly being  
279 consumed in high quantities (Gorski et al., 2016). Growing evidence associating consumption of beef  
280 and mutton with a severe allergic reaction termed “*midnight anaphylaxis*” implies that substitution with  
281 these meats from these species may pose a health risk to susceptible populations (Gray et al., 2016).  
282 While the detection of these undeclared species could be a result of unintentional cross-contamination,  
283 such as from dirty knives or surfaces, we accounted for these potential mishaps by testing inner parts  
284 excised from the raw meat samples. These results highlight the need for intensified surveillance of  
285 species substitution in the meat value chain in Kenya. Targeted surveillance may also be applied to  
286 goat value chains and other high value species where adulteration could be linked to fraudulent  
287 financial gain.

288 This study demonstrates the utility of PCR-HRM for detecting multiple vertebrate species in meat  
289 products. We were able to detect composite vertebrate species in mixed meat samples by using  
290 different combinations of *COI*, *cyt b* and *16 rRNA*. Adulteration of meat with products from multiple  
291 species is increasingly being reported (Ali et al., 2015; Di Pinto et al., 2015; Izadpanah et al., 2018;  
292 Kitpipit et al., 2014; O'Mahony, 2013), raising the demand for affordable and faster techniques for  
293 their detection. Many studies describing multi-species analysis of vertebrates in meat have utilized  
294 multiplex PCR (Ali et al., 2015; Balakrishna et al., 2019; Izadpanah et al., 2018; Kitpipit et al., 2014;  
295 Li et al., 2019; Liu et al., 2019; Qin et al., 2019; Wang et al., 2020). While useful, multiplex PCR  
296 requires use of expensive probes and post-PCR procedures such as agarose gel electrophoresis for size  
297 separation of amplicons and/or DNA sequencing, thereby increasing analysis time, cost, and risk of  
298 cross-contamination. The PCR-HRM technique is hinged on measuring the rate of dissociation of PCR  
299 amplicons from double-stranded to single-stranded forms when subjected to gradual heating.  
300 Therefore, it allows real-time detection while minimizing downstream steps and costs. In a previous  
301 study, we demonstrated the utility of PCR-HRM in distinguishing up to 32 vertebrate species (Ouso et  
302 al., 2020), whereby DNA sequencing was performed only on representative samples for purposes of  
303 species confirmation, or to investigate samples with questionable or novel melt profiles.

304 This study shows that PCR-HRM would be particularly useful in investigating admixture of vertebrate  
305 species in commercial processed meat products such as sausages, kebabs, meatballs and hams, which  
306 are frequently adulterated with multiple undeclared meats during processing (Wang et al., 2020). In  
307 performing such analysis, our findings underpin the need to employ more than one marker to ensure  
308 accurate species identification in meat admixtures. Over-reliance on a single marker could result in  
309 overlaps in melt curves of different species resulting in decreased sensitivity and poor resolution of  
310 meat mixtures (Lopez-Oceja et al., 2017). Due to the unpredictability associated with meat mixtures,

311 we recommend the use of multiple mitochondrial markers, coupled with careful design and selection of  
312 primers for PCR-HRM studies.

313 The application of various treatments to the meat samples allowed us to mimic the conditions and states  
314 of degradation that meat samples may be found in due to post-slaughter changes from cooking, sun-  
315 drying, or rotting (Ramanan & Khapugin, 2017). This was important because the efficiency of PCR is  
316 sensitive to inhibitors that may potentially affect amplification and amplicon melt temperatures ( $T_m$ ).  
317 The melting profiles were similar across raw, cooked, and rotten meat samples with most samples  
318 having  $T_m$  shifts of  $< 1^\circ\text{C}$ . However, exposure to heat treatment in the microwaved samples resulted in  
319 lower amplification rates and increased the *16S rRNA* marker  $T_m$  of one cattle sample by  $> 1^\circ\text{C}$ . A  
320 shift of this magnitude was however, not evident when targeting the *COI* marker showing that the use  
321 of this marker in conjunction with the others will improve species identification in meats exposed to  
322 heat post-slaughter. Our findings also imply that although reliable species distinction requires a  $T_m$   
323 shift of  $< 1^\circ\text{C}$ , it can be more in treated samples, hence the need for further studies to optimize  
324 acceptable thresholds. Nonetheless, across markers, species identification by PCR-HRM is  
325 reproducible despite varying physicochemical states of the meat samples.

326 Our results also demonstrate that the use of different DNA extraction protocols yielded only slight  
327 variations between same-species samples. Notably, the deviation from the control DNA isolation kit  
328 (the ISOLATE II commercial kit) was minimal ( $< 1^\circ\text{C}$ ), with the lab-optimized protocol having a  
329 slightly wider range in melting temperature compared to the other protocols used. The variation in  
330 melting temperature across different protocols was likely caused by the difference in salt  
331 concentrations of the DNA yielded. Cations such as  $\text{Mg}^{2+}$  and  $\text{Na}^+$  interact with the highly charged  
332 DNA polyanion, favoring DNA-melting in conditions with lower  $\text{Na}^+$  concentrations (Ouso et al.,  
333 2020; Tan & Chen, 2006). Nevertheless, despite the marginal amplicon  $T_m$  shifts, melting profiles did  
334 not vary, confirming that PCR-HRM can be used with various DNA extraction protocols.

335 While PCR-HRM allows for efficient and reliable differentiation of species substitution in the meat  
336 value chain, it is not without limitations. PCR-HRM relies on identification of vertebrate species  
337 against reference samples that are run alongside the assays as positive controls. However, the samples  
338 selected as references may be subjective, determined by what researchers may deem as important,  
339 hence leaving other species in the initial analysis. Nevertheless, our previous studies show that PCR-  
340 HRM analysis provides a degree discovery of novel/uncharacterized species, which can be identified  
341 by DNA sequencing (Ouso et al., 2020). Furthermore, the mitochondrial markers *COI* and *cyt b*, are  
342 often used singly in species identification (Di Pinto et al., 2015; Lopez-Oceja et al., 2017; Izadpanah et  
343 al., 2018), but our results indicate the need to use multiple markers in tandem for accurate species  
344 identification. Finally, mitochondrial markers which are commonly used for DNA barcoding of  
345 species, are not appropriate for quantification of species adulteration in meat mixtures because there are  
346 major differences in gene copies of mtDNA markers in different species ( Ballin et al., 2009; Cai et al.,  
347 2017).

## 348 **5. Conclusions**

349 This study demonstrates the utility of PCR-HRM for efficient and reliable detection of species  
350 substitution as a form of fraud in the meat value chain. We utilized this technique to identify species  
351 substitution in Nairobi's major meat market. We also showed that PCR-HRM is a robust technique,  
352 providing reproducible results in both single or mixed species samples despite variations in  
353 physicochemical properties or presence of multiple DNA extraction protocols. Our study shows that  
354 PCR-HRM enables identification of vertebrate species in meat samples without having to perform  
355 extensive DNA sequencing on most of the samples, making it the molecular tool of choice for  
356 surveillance of food fraud in low-resource settings such as those found in sub-Saharan Africa and other  
357 developing economies. Finally, this work demonstrates the importance of using the multiple  
358 mitochondrial markers including *COI*, *cyt b*, and *16S rRNA* to accurately distinguish species.

359 **Acknowledgements**

360 We acknowledge the technical support of Nancy Kagendi, Edward Makhulu and Joseph Oundo of  
361 *icipe*'s ML-EID laboratory, and James Kabii of Molecular Biology and Bioinformatics Unit. We are  
362 thankful to Daniel Ouso for the provision of vertebrate positive controls used in the study. We also  
363 acknowledge the logistic support of Faith Kyengo, and Margaret Ochanda of the Capacity Building  
364 Unit at *icipe*, and Daudi Mutua of the Procurement Unit. We also thank Vivian Kerubo, of the Geo-  
365 Information Unit, *icipe* for her assistance in making the map.

366 **Funding**

367 This study was funded by the United States Agency for International Development Partnerships for  
368 Enhanced Engagement in Research (USAID-PEER) cycle 4, which was awarded to LW and JV, under  
369 the USAID grant No. AID-OAA-A-11-00012 sub-awarded by the American National Academy of  
370 Sciences (NAS) under agreement No. 2000006204. Further support was provided by *icipe* institutional  
371 funding from the UK's Department for International Development (DFID), the Swiss Agency for  
372 Development and Cooperation (SDC), the Swedish International Development Cooperation Agency  
373 (SIDA), and the Kenyan government. These funding bodies did not play a role in the design of this  
374 study, the data collection, interpretation of the data, or writing and submission of this publication.

376 **Author Contributions**

377 **Jane Njaramba:** Investigation, Writing original draft, Data curation, Formal analysis. **Lillian**  
378 **Wambua:** Conceptualization, Funding acquisition, Writing original draft, Methodology, Formal  
379 analysis, Supervision. **Titus Mukiyama:** Supervision. **Nelson Amugune:** Supervision. **Jandouwe**  
380 **Villinger:** Funding acquisition, Formal analysis, Methodology, Supervision, Visualization. **All**  
381 **authors:** Writing- Reviewing and Editing.

382

## 383 **References**

- 384 Abbas, O., Zadavec, M., Baeten, V., Mikuš, T., Lešić, T., Vulić, A., Prpić, J., Jemeršić, L., & Pleadin,  
385 J. (2018). Analytical methods used for the authentication of food of animal origin. *Food Chemistry*,  
386 *246*(May), 6–17. <https://doi.org/10.1016/j.foodchem.2017.11.007>
- 387 Alarcon, P., Fèvre, E. M., Muinde, P., Murungi, M. K., Kiambi, S., Akoko, J., & Rushton, J. (2017a).  
388 Urban livestock keeping in the city of Nairobi: diversity of production systems, supply chains, and their  
389 disease management and risks. *Frontiers in Veterinary Science*, *4*, 171.  
390 <https://doi.org/10.3389/fvets.2017.00171>
- 391 Alarcon, P., Fèvre, E. M., Murungi, M. K., Muinde, P., Akoko, J., Dominguez-Salas, P., Kiambi, S.,  
392 Ahmed, S., Häslér, B., & Rushton, J. (2017b). Mapping of beef, sheep and goat food systems in  
393 Nairobi - A framework for policy making and the identification of structural vulnerabilities and  
394 deficiencies. *Agricultural Systems*, *152*, 1–17. <https://doi.org/10.1016/j.agsy.2016.12.005>
- 395 Ali, Md. E., Razzak, Md. A., Hamid, S. B. A., Rahman, Md. M., Amin, Md. A., Rashid, N. R. A., &  
396 Asing. (2015). Multiplex PCR assay for the detection of five meat species forbidden in Islamic foods.  
397 *Food Chemistry*, *177*, 214–224. <https://doi.org/10.1016/j.foodchem.2014.12.098>
- 398 Al-Kahtani, H. A., Ismail, E. A., & Asif Ahmed, M. (2017). Pork detection in binary meat mixtures and  
399 some commercial food products using conventional and real-time PCR techniques. *Food Chemistry*,  
400 *219*, 54–60. <https://doi.org/10.1016/j.foodchem.2016.09.108>
- 401 Altschul, S. F., Gish, W., Miller, W., Myers, E. W., & Lipman, D. J. (1990). Basic local alignment  
402 search tool. *Journal of Molecular Biology*, *15*(3), 403–410. doi:10.1016/S0022-2836(05)80360-2
- 403 Balakrishna, K., Sreerohini, S., & Parida, M. (2019). Ready-to-use single tube quadruplex PCR for  
404 differential identification of mutton, chicken, pork and beef in processed meat samples. *Food Additives*  
405 *& Contaminants: Part A*, *36*(10), 1435–1444. <https://doi.org/10.1080/19440049.2019.1633477>
- 406 Ballin, N. Z., Vogensen, F. K., & Karlsson, A. H. (2009). Species determination - Can we detect and  
407 quantify meat adulteration? *Meat Science*, *83*(2), 165–174.  
408 <https://doi.org/10.1016/j.meatsci.2009.06.003>
- 409 Bourguiba-Hachemi, S., & Fathallah, M. D. (2016). DNA testing of meat foods raises issues  
410 beyond adulteration. *Sky Journal of Food Science*, *5*(1), 1-7. <http://www.skyjournals.org/SJFS>
- 411 Cai, Y., He, Y., Lv, R., Chen, H., Wang, Q., & Pan, L. (2017). Detection and quantification of beef and  
412 pork materials in meat products by duplex droplet digital PCR. *PLoS One*, *12*(8), e0181949.
- 413 Cawthorn, D. M., Steinman, H. A., & Hoffman, L. C. (2013). A high incidence of species substitution  
414 and mislabelling detected in meat products sold in South Africa. *Food Control*, *32*(2), 440–449.  
415 <https://doi.org/10.1016/j.foodcont.2013.01.008>
- 416 Chuah, L. O., He, X. Bin, Effarizah, M. E., Syahariza, Z. A., Shamila-Syuhada, A. K., & Rusul, G.  
417 (2016). Mislabelling of beef and poultry products sold in Malaysia. *Food Control*, *62*, 157–164.  
418 <https://doi.org/10.1016/j.foodcont.2015.10.030>
- 419 Di Pinto, A., Bottaro, M., Bonerba, E., Bozzo, G., Ceci, E., Marchetti, P., Mottola, A., & Tantillo, G.  
420 (2015). Occurrence of mislabeling in meat products using DNA-based assay. *Journal of Food Science*  
421 *and Technology*, *52*(4), 2479–2484. <https://doi.org/10.1007/s13197-014-1552-y>
- 422 Fang, X., & Zhang, C. (2016). Detection of adulterated murine components in meat products by  
423 TaqMan© real-time PCR. *Food Chemistry*, *192*, 485–490.  
424 <https://doi.org/10.1016/j.foodchem.2015.07.020>



- 425 Farag, M. R., Alagawany, M., Abd El-Hack, M. E., Tiwari, R., & Dhama, K. (2015). Identification of  
426 different animal species in meat and meat Products: Trends and advances. *Advances in Animal and*  
427 *Veterinary Sciences*, 3(6), 334–347.
- 428 Gorski, I., Chung, W.-C., Herr, K., & Mehta, K. (2016). Nyama choma culture: Implications of  
429 increased red meat and alcohol consumption in East Africa. *Journal of Sustainable Development*, 9(6),  
430 96. <https://doi.org/10.5539/jsd.v9n6p96>
- 431 Gray, C., van Zyl, A., & Strauss, L. (2016). ‘Midnight anaphylaxis’ to red meat in patients with alpha-  
432 gal sensitisation: A recent discovery in the food allergy world and a case report from South Africa.  
433 *Current Allergy and Clinical Immunology*, 29(2), 102–104.
- 434 Handford, C. E., Campbell, K., & Elliott, C. T. (2016). Impacts of milk fraud on food safety and  
435 nutrition with special emphasis on developing countries. *Comprehensive Reviews in Food Science and*  
436 *Food Safety*, 15(1), 130–142. <https://doi.org/10.1111/1541-4337.12181>
- 437 Ivanova, N. V., Clare, E. L., & Borisenko, A. V. (2012). DNA Barcodes: Methods and Protocols. In  
438 *Methods in Molecular Biology* (Vol. 858, pp. 355–361). <https://doi.org/10.1007/978-1-61779-591-6>
- 439 Izadpanah, M., Mohebal, N., Elyasi gorji, Z., Farzaneh, P., Vakhshiteh, F., & Shahzadeh Fazeli, seyed  
440 A. (2018). Simple and fast multiplex PCR method for detection of species origin in meat products.  
441 *Journal of Food Science and Technology*, 55(2), 698–703. <https://doi.org/10.1007/s13197-017-2980-2>
- 442 Kearse, M., Moir, R., Wilson, A., Stones-Havas, S., Cheung, M., Sturrock, S., Buxton, S., Cooper, A.,  
443 Markowitz, S., Duran, C., Thierer, T., Ashton, B., Meintjes, P., & Drummond, A. (2012). Geneious  
444 Basic: An integrated and extendable desktop software platform for the organization and analysis of  
445 sequence data. *Bioinformatics*, 28(12), 1647–1649. <https://doi.org/10.1093/bioinformatics/bts199>
- 446 Kenya Markets Trust. (2019). A study on meat end-market trends in Kenya.  
447 <http://www.kenyamarkets.org/wp-content/uploads/2019/05/Meat-End-Market-Trends-in-Kenya.pdf>.  
448 Accessed 14 August 2020.
- 449 Kimwele, C. N., Karisa, B. K., Stokes, M., Junga, J. O., Hanotte, O., Skilton, R. A., & McElroy, D.  
450 (2012). DNA species surveillance: Monitoring bushmeat poaching and trading in Kenya using partial  
451 cytochrome b gene. *African Journal of Biotechnology*, 11(78). <https://doi.org/10.5897/AJB11.2813>
- 452 Kipanga, P. N., Omondi, D., Mireji, P. O., Sawa, P., Masiga, D. K., & Villinger, J. (2014). High-  
453 resolution melting analysis reveals low *Plasmodium* parasitaemia infections among microscopically  
454 negative febrile patients in western Kenya. *Malaria Journal*, 13(1), 1–8. <https://doi.org/10.1186/1475-2875-13-429>
- 455
- 456 Kitpipit, T., Sittichan, K., & Thanakiatkrai, P. (2014). Direct-multiplex PCR assay for meat species  
457 identification in food products. *Food Chemistry*, 163, 77–82.  
458 <https://doi.org/10.1016/j.foodchem.2014.04.062>
- 459 Lee, H. C., Lai, K., Lorenc, M. T., Imelfort, M., Duran, C., & Edwards, D. (2012). Bioinformatics tools  
460 and databases for analysis of next-generation sequence data. *Briefings in Functional Genomics*, 11(1),  
461 12–24. <https://doi.org/10.1093/bfpg/elr037>
- 462 Lee, P. S., Sing, K. W., & Wilson, J. J. (2015). Reading mammal diversity from flies: the persistence  
463 period of amplifiable mammal mtDNA in blowfly guts (*Chrysomya megacephala*) and a new DNA  
464 mini-barcode target. *PloS one*, 10(4), e0123871.

- 465 Li, J., Li, J., Xu, S., Xiong, S., Yang, J., Chen, X., Wang, S., Qiao, X., & Zhou, T. (2019). A rapid and  
466 reliable multiplex PCR assay for simultaneous detection of fourteen animal species in two tubes. *Food*  
467 *Chemistry*, 295, 395–402. <https://doi.org/10.1016/j.foodchem.2019.05.112>
- 468 Liu, W., Tao, J., Xue, M., Ji, J., Zhang, Y., Zhang, L., & Sun, W. (2019). A multiplex PCR method  
469 mediated by universal primers for the identification of eight meat ingredients in food products.  
470 *European Food Research and Technology*, 245(11), 2385–2392. [https://doi.org/10.1007/s00217-019-](https://doi.org/10.1007/s00217-019-03350-9)  
471 03350-9
- 472 Lopez-Oceja, A., Nuñez, C., Baeta, M., Gamarra, D., & De Pancorbo, M. M. (2017). Species  
473 identification in meat products: A new screening method based on high resolution melting analysis of  
474 *cyt b* gene. *Food Chemistry*, 237, 701-706. <https://doi.org/10.1007/s00217-019-03350-9>
- 475 Mbugua, D., Kimwele, C. N., Jung'a, J. O., Gatebe, E., Gakuya, F., Kinuthia, M. J., & Kwamboka, E.  
476 S. (2014). Use of cytochrome oxidase 1 gene region: a molecular tool for the domestic and wildlife  
477 industry in Kenya. *Scientific Journal of Animal Science*.3(3), 87–94.  
478 <https://doi.org/10.14196/sjas.v3i3.1137>
- 479 Meusnier, I., Singer, G. A., Landry, J. F., Hickey, D. A., Hebert, P. D., & Hajibabaei, M. (2008). A  
480 universal DNA mini-barcode for biodiversity analysis. *BMC genomics*, 9(1), 1-4.
- 481 Nasreen, S., & Ahmed, T. (2014). Food adulteration and consumer awareness in Dhaka City, 1995-201.  
482 *J Health Popul Nutri*, 32(3), 452–464.
- 483 Ogola, E., Villinger, J., Mabuka, D., Omondi, D., Orindi, B., Mutunga, J., Owino, V., & Masiga, D. K.  
484 (2017). Composition of *Anopheles* mosquitoes, their blood-meal hosts, and *Plasmodium falciparum*  
485 infection rates in three islands with disparate bed net coverage in Lake Victoria, Kenya. *Malaria*  
486 *Journal*, 16(1), 1–12. <https://doi.org/10.1186/s12936-017-2015-5>
- 487 O'Mahony, P. J. (2013). Finding horse meat in beef products-a global problem. *Qjm*, 106(6), 595–597.  
488 <https://doi.org/10.1093/qjmed/hct087>
- 489 Omondi, D., Masiga, D. K., Ajamma, Y. U., Fielding, B. C., Njoroge, L., & Villinger, J. (2015).  
490 Unraveling host-vector-arbovirus interactions by two-gene high resolution melting mosquito bloodmeal  
491 analysis in a Kenyan wildlife-livestock interface. *PLoS ONE*, 10(7), 1–23.  
492 <https://doi.org/10.1371/journal.pone.0134375>
- 493 Ouso, D. O., Otiende, M. Y., Jeneby, M. M., Oundo, J. W., Bargul, J. L., Miller, S. E., Wambua, L., &  
494 Villinger, J. (2020). Three-gene PCR and high-resolution melting analysis for differentiating vertebrate  
495 species mitochondrial DNA for biodiversity research and complementing forensic surveillance.  
496 *Scientific Reports*, 10(1), 4741. <https://doi.org/10.1038/s41598-020-61600-3>
- 497 Panghal, A., Yadav, D. N., Khatkar, B. S., Sharma, H., Kumar, V., & Chhikara, N. (2018). Post-harvest  
498 malpractices in fresh fruits and vegetables: food safety and health issues in India. *Nutrition and Food*  
499 *Science*, 48(4), 561–578. <https://doi.org/10.1108/NFS-09-2017-0181>
- 500 Qin, P., Qu, W., Xu, J., Qiao, D., Yao, L., Xue, F., & Chen, W. (2019). A sensitive multiplex PCR  
501 protocol for simultaneous detection of chicken, duck, and pork in beef samples. *Journal of Food*  
502 *Science and Technology*, 56(3), 1266–1274. <https://doi.org/10.1007/s13197-019-03591-2>
- 503 Ramanan, S. S., & Khapugin, A. A. (2017). *Problematic Wildlife: A Cross-Disciplinary Approach* (F.  
504 M. Angelici, Ed.). Springer International Publishing. <https://doi.org/10.1007/978-3-319-22246-2>

- 505 Ratnasingham, S., & Hebert, P. D. N. (2007). BOLD: The Barcode of Life Data System  
506 (<http://www.barcodinglife.org>). *Molecular Ecology Notes*, 7(3): 355–364. doi: 10.1111/j.1471-  
507 8286.2007.01678.x
- 508 Reed, G. H., Kent, J. O., & Wittwer, C. T. (2007). High-resolution DNA melting analysis for simple  
509 and efficient molecular diagnostics. *Pharmacogenomics*, 8(6), 597–608.  
510 <https://doi.org/10.2217/14622416.8.6.597>
- 511 Ren, J., Deng, T., Huang, W., Chen, Y., & Ge, Y. (2017). A digital PCR method for identifying and  
512 quantifying adulteration of meat species in raw and processed food. *PLoS ONE*, 12(3), 1–17.  
513 <https://doi.org/10.1371/journal.pone.0173567>
- 514 Sakaridis, I., Ganopoulos, I., Argiriou, A., & Tsaftaris, A. (2013). A fast and accurate method for  
515 controlling the correct labeling of products containing buffalo meat using high resolution melting  
516 (HRM) analysis. *Meat Science*, 94(1), 84–88. <https://doi.org/10.1016/j.meatsci.2012.12.017>
- 517 Silvis, I. C. J., van Ruth, S. M., van der Fels-Klerx, H. J., & Luning, P. A. (2017). Assessment of food  
518 fraud vulnerability in the spices chain: An explorative study. *Food Control*, 81(May), 80–87.  
519 <https://doi.org/10.1016/j.foodcont.2017.05.019>
- 520 Song'oro, E., Muigai, A., Kimwele, C., Gatebe, E., Mwaniki, M., Kinuthia, J., & Osiemo, Z. (2012).  
521 Optimization of PCR conditions to amplify mitochondrial COI gene fragments of wildlife species in  
522 Kenya. *Asian Journal of Biological and Life Sciences*. 1(3), 191-196.
- 523 Spink, J., & Moyer, D. C. (2011). Defining the public health threat of food fraud. *Journal of Food*  
524 *Science*, 76(9). <https://doi.org/10.1111/j.1750-3841.2011.02417.x>
- 525 Tan, Z. J., & Chen, S. J. (2006). Nucleic acid helix stability: Effects of salt concentration, cation  
526 valence and size, and chain length. *Biophysical Journal*, 90(4), 1175–1190.  
527 <https://doi.org/10.1529/biophysj.105.070904>
- 528 Wang, W., Wang, X., Zhang, Q., Liu, Z., Zhou, X., & Liu, B. (2020). A multiplex PCR method for  
529 detection of five animal species in processed meat products using novel species-specific nuclear DNA  
530 sequences. *European Food Research and Technology*. <https://doi.org/10.1007/s00217-020-03494-z>
- 531 Woolfe, M., & Primrose, S. (2004). Food forensics: Using DNA technology to combat misdescription  
532 and fraud. *Trends in Biotechnology*, 22(5), 222–226. <https://doi.org/10.1016/j.tibtech.2004.03.010>
- 533 Yadav, S. (2018). Edible oil adulterations: Current issues, detection techniques, and health hazards.  
534 *International Journal of Chemical Studies*, 6(2), 1393–1397.

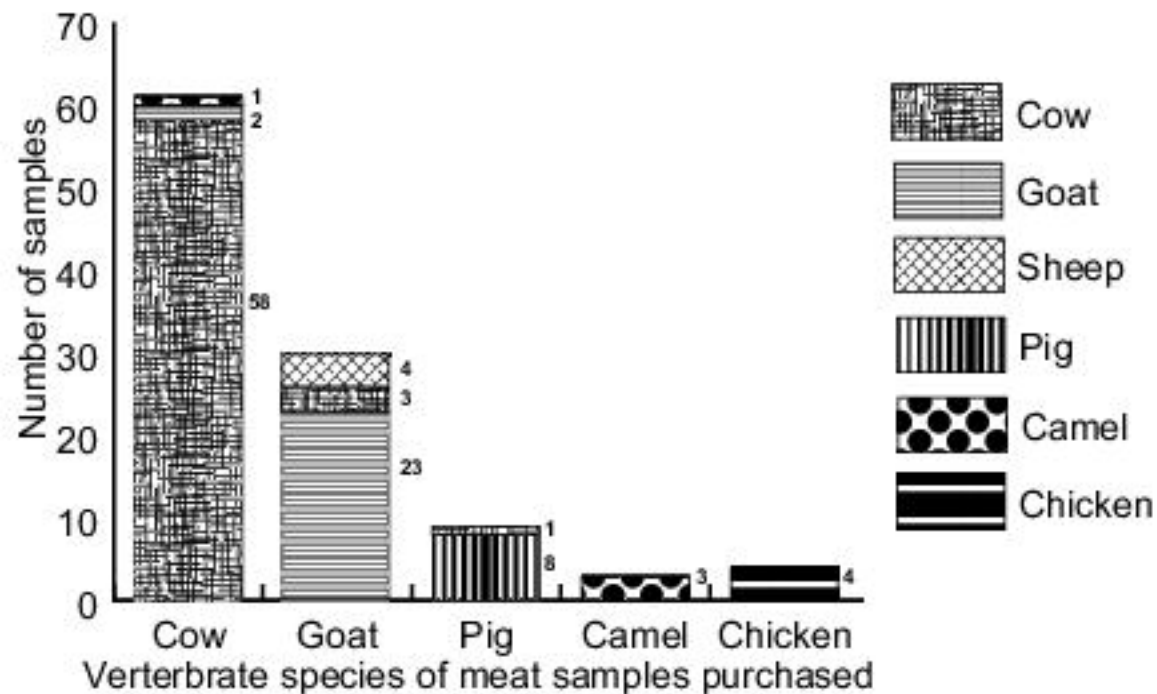

 CO1, *cyt b*, 16S rRNA

 CO1 and *cyt b*

 *cyt b* and 16S rRNA

 CO1 and 16S rRNA

 Only CO1

|                                             | Cattle                                                                              | Goat                                                                                | Sheep                                                                               | Camel                                                                               | Chicken                                                                             | Nile perch                                                                           | Rabbit                                                                               | Pig                                                                                 |
|---------------------------------------------|-------------------------------------------------------------------------------------|-------------------------------------------------------------------------------------|-------------------------------------------------------------------------------------|-------------------------------------------------------------------------------------|-------------------------------------------------------------------------------------|--------------------------------------------------------------------------------------|--------------------------------------------------------------------------------------|-------------------------------------------------------------------------------------|
| Cattle ( <i>Bos taurus</i> )                |                                                                                     |  |  |                                                                                     |                                                                                     |                                                                                      |                                                                                      |                                                                                     |
| Goat ( <i>Capra hircus</i> )                |  |                                                                                     |                                                                                     |                                                                                     |                                                                                     |                                                                                      |                                                                                      |                                                                                     |
| Sheep ( <i>Ovis aries</i> )                 |  |                                                                                     |                                                                                     |                                                                                     |                                                                                     |                                                                                      |                                                                                      |                                                                                     |
| Camel ( <i>Camelus dromedarius</i> )        |                                                                                     |                                                                                     |                                                                                     |                                                                                     |                                                                                     |                                                                                      |   |                                                                                     |
| Chicken ( <i>Gallus gallus domesticus</i> ) |                                                                                     |                                                                                     |                                                                                     |                                                                                     |                                                                                     |   |                                                                                      |                                                                                     |
| Nile perch ( <i>Lates niloticus</i> )       |                                                                                     |                                                                                     |                                                                                     |                                                                                     |  |                                                                                      |                                                                                      |  |
| Rabbit ( <i>Oryctolagus cuniculus</i> )     |                                                                                     |                                                                                     |                                                                                     |  |                                                                                     |                                                                                      |                                                                                      |  |
| Pig ( <i>Sus scrofa domesticus</i> )        |                                                                                     |                                                                                     |                                                                                     |                                                                                     |                                                                                     |  |  |                                                                                     |

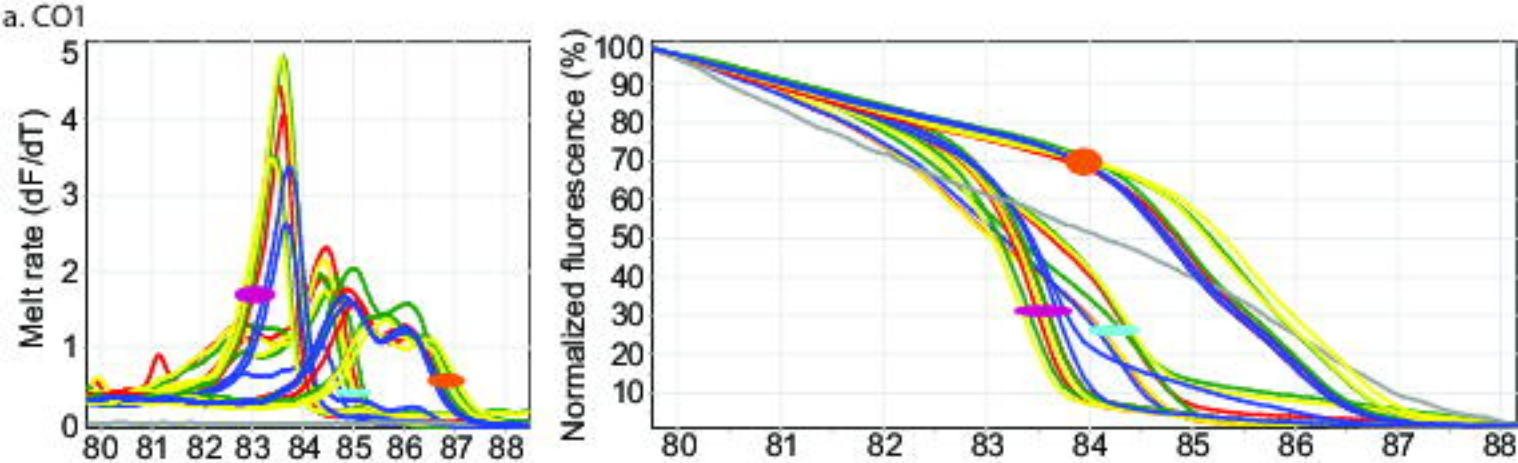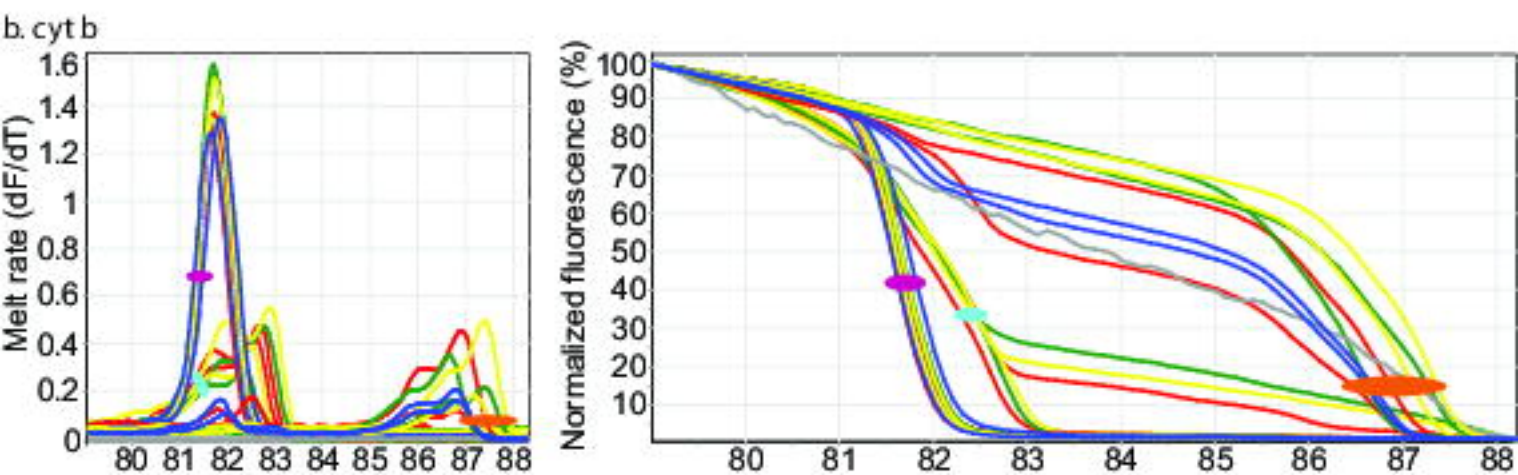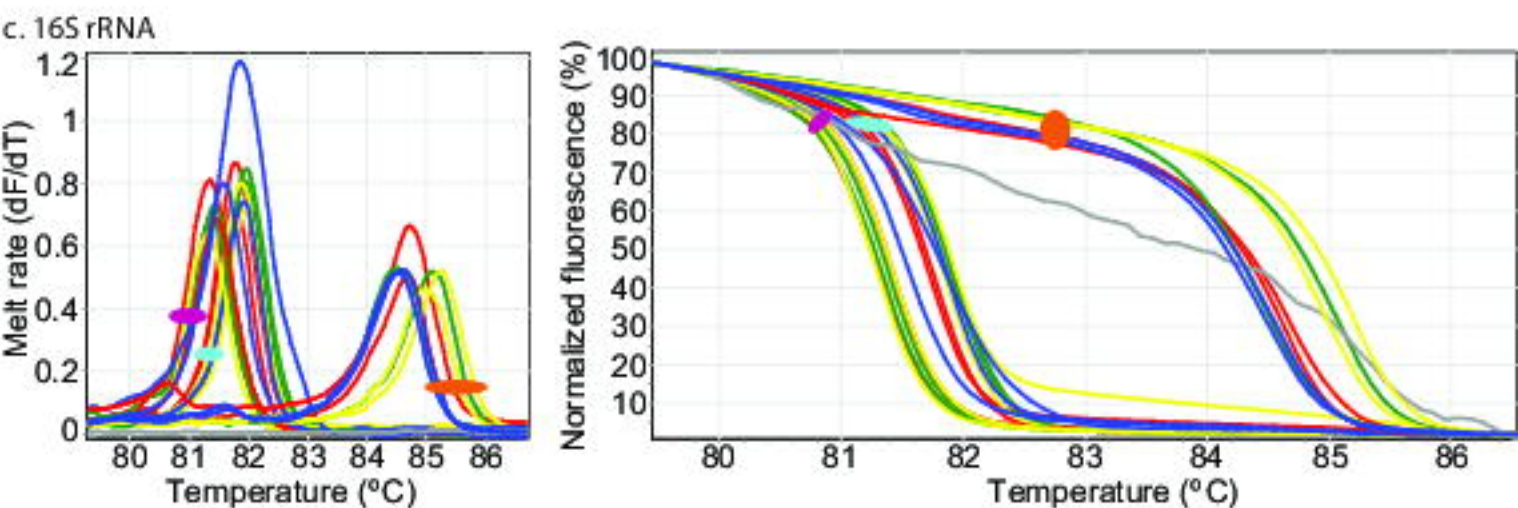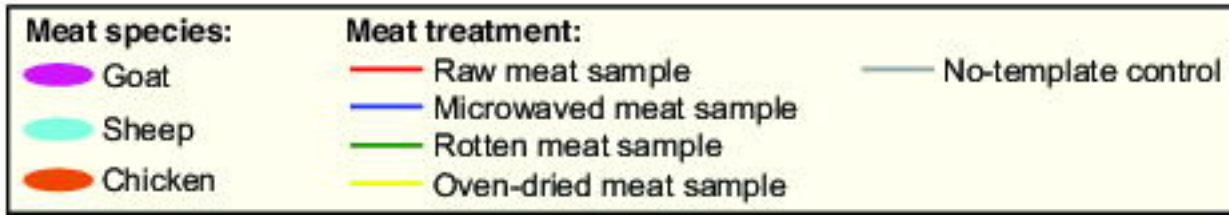

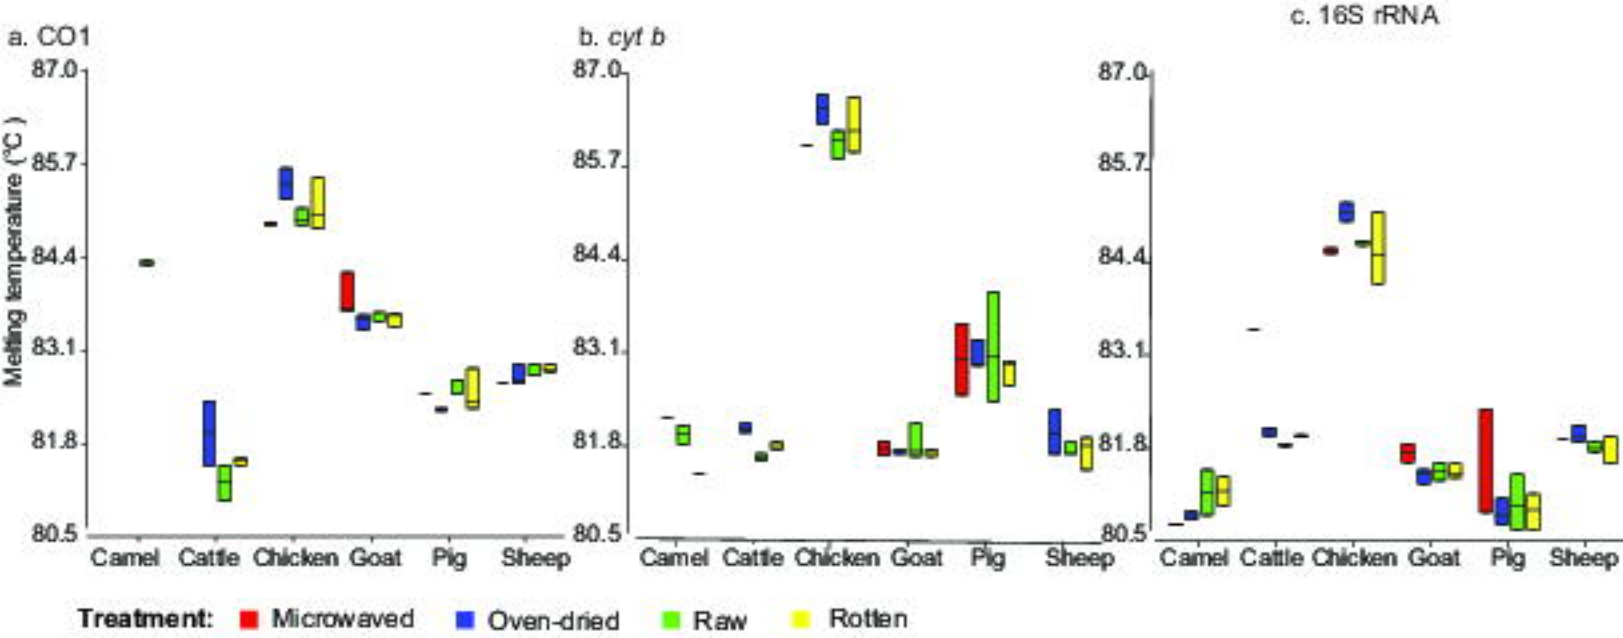

a. CO1

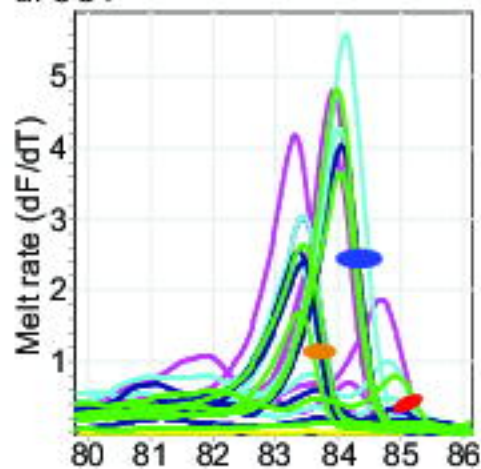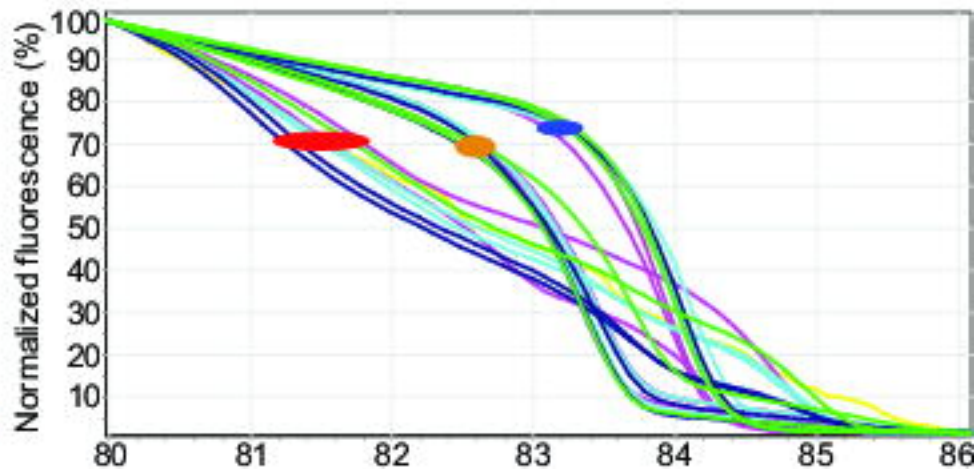

b. Cyt b

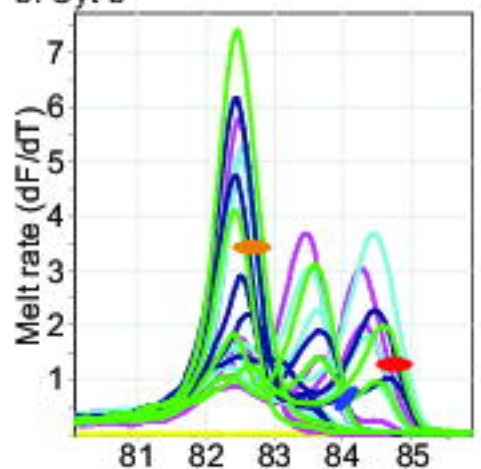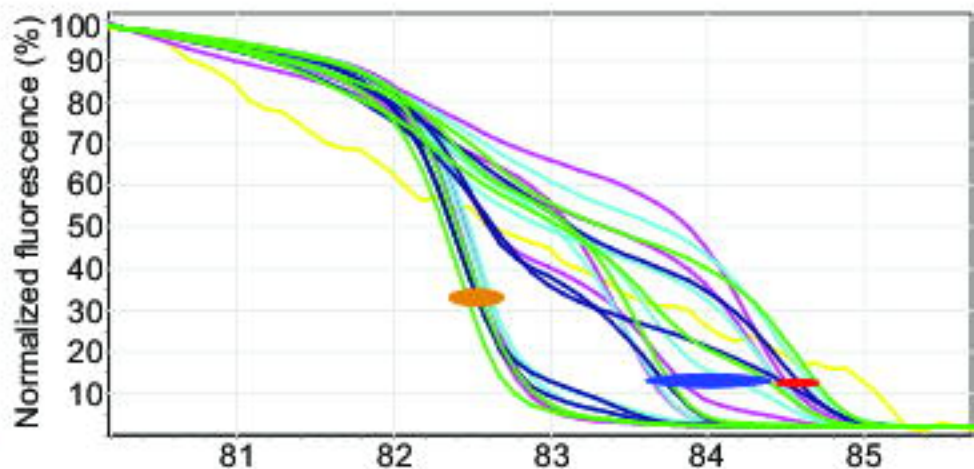

c. 16S rRNA

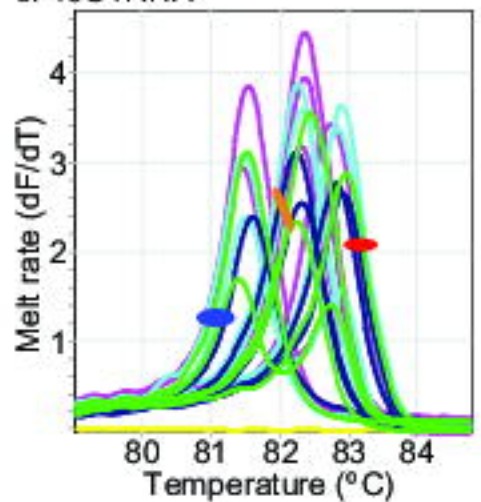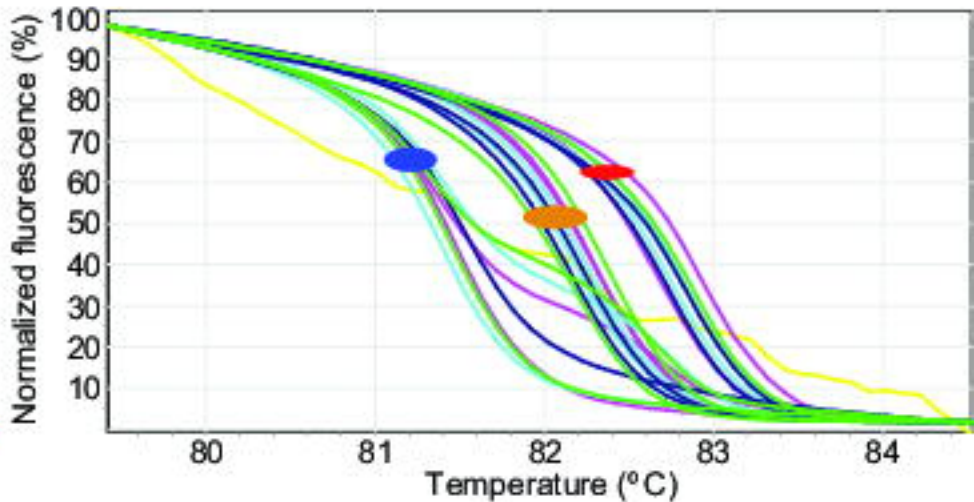

**Meat species:**

- Goat
- Camel
- Cattle

**Extraction method:**

- Qiagen
- Manual (with proteinase K)
- Manual (no proteinase K)
- Isolate II
- No-template control



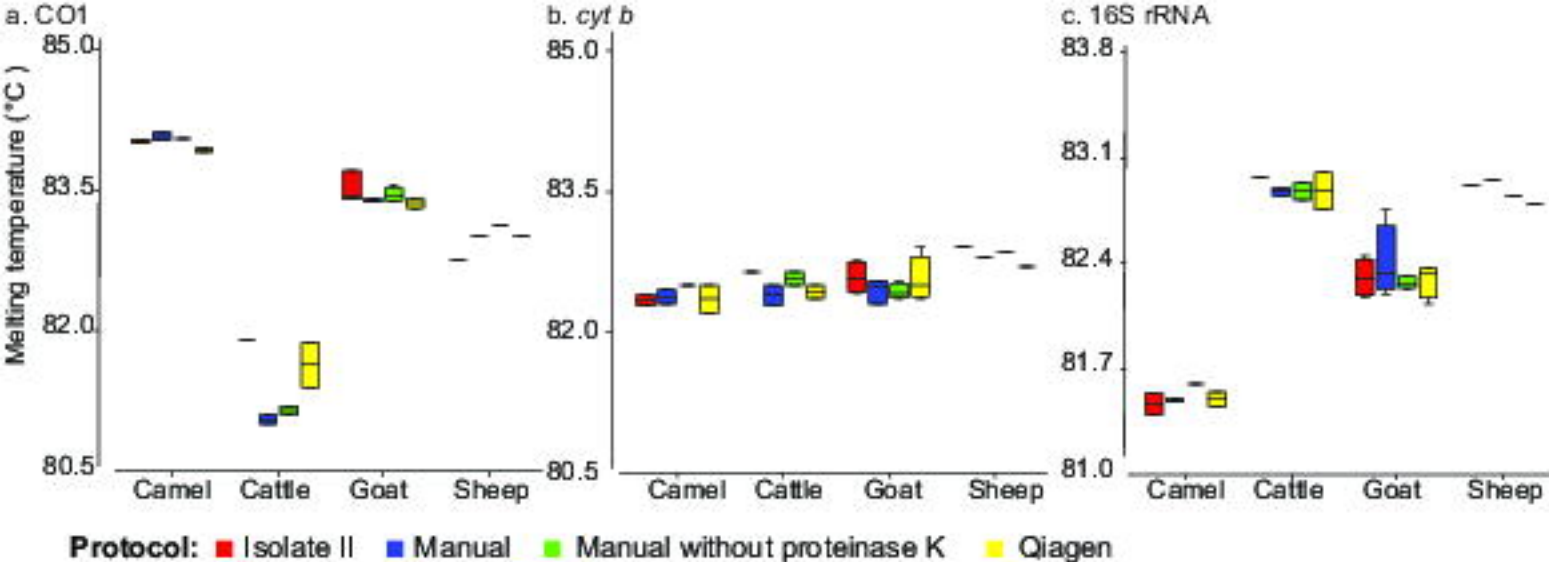

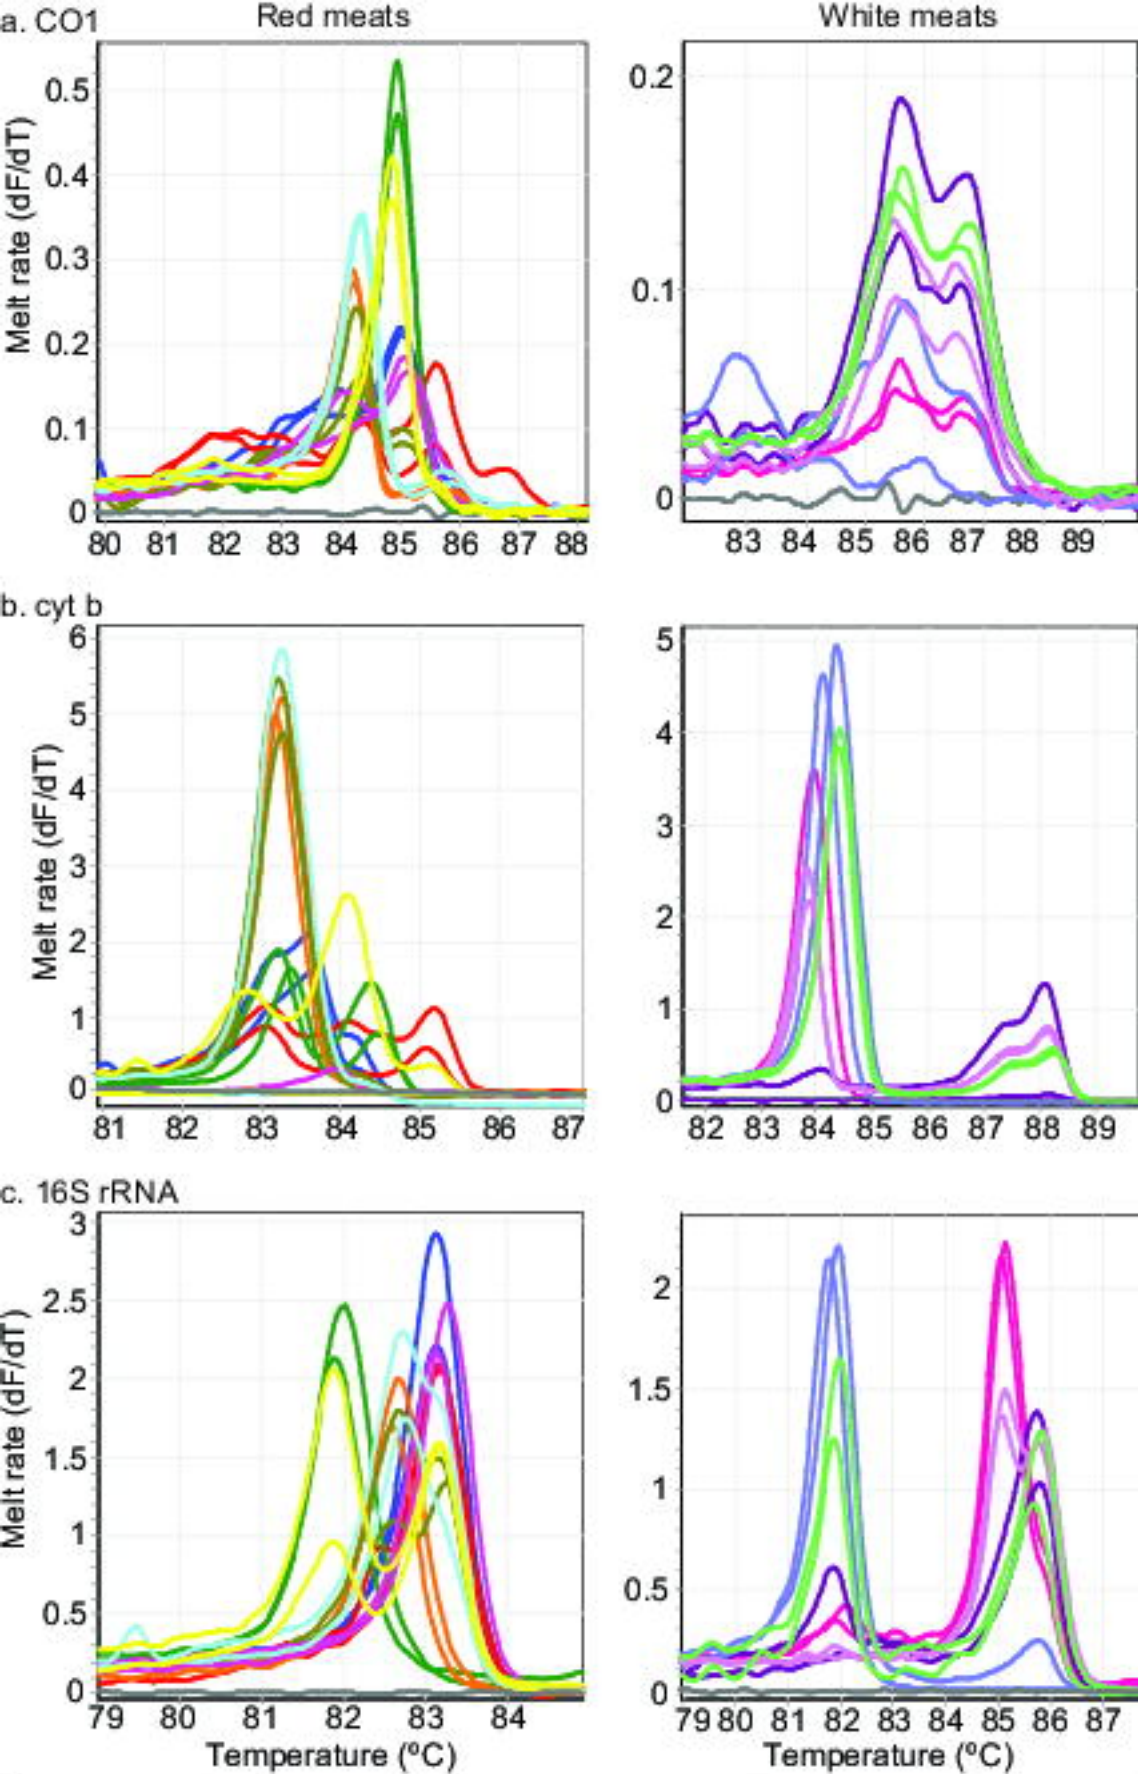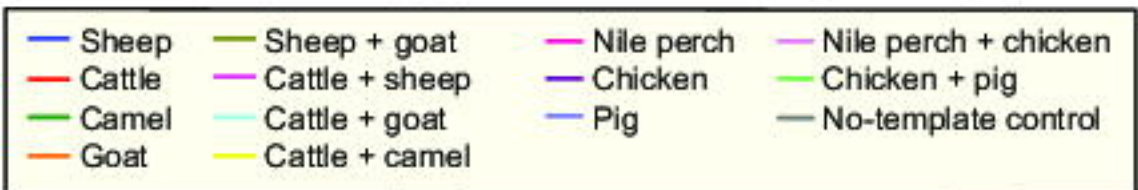

Source: https://www.biorxiv.org/content/10.1101/2021.01.12.426171v1.full.pdf
